# Supplementary material
Source: PubMed Central journal article supplement (PMC7192531)
Supplement: supp_fig1_deaa017.pdf [file supp_fig1_deaa017.pdf]

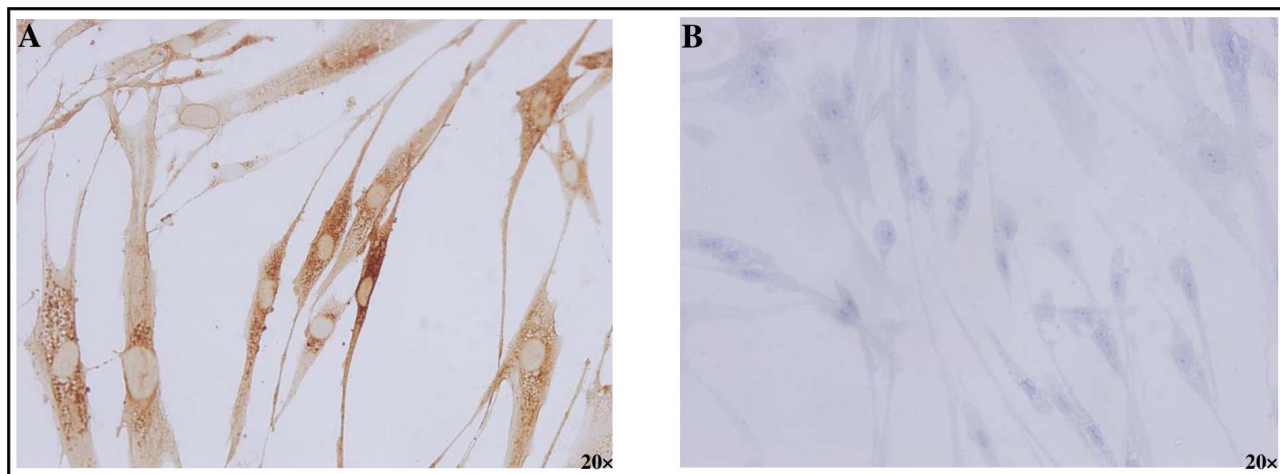

**Supplementary Figure S1 CD-10 immunocytochemistry.** The purity of ESCs was examined by immunostaining for **(A)** endometriosis stromal marker CD10 utilising mouse anti human CD10 antibody (MCA1806T from Bio-Rad). **(B)** Experimental control (no primary antibody).
