# Supplementary material
Source: PubMed Central journal article supplement (PMC7192531)

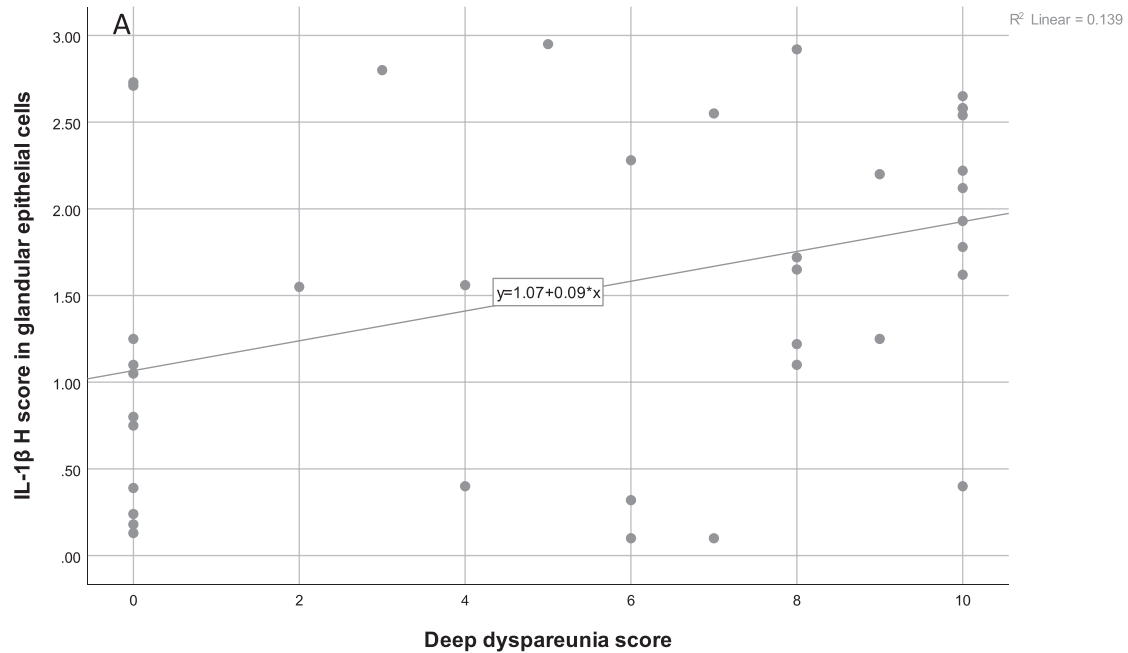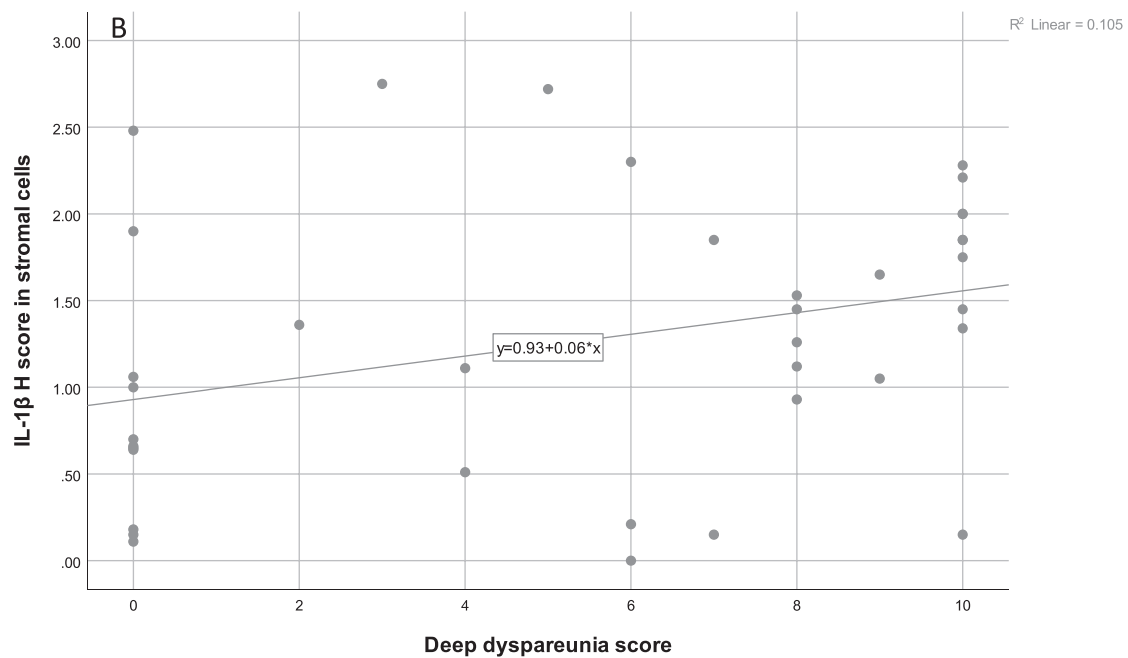

**Supplementary Figure S2 Scatterplots with linear fit line showing the correlation between IL-1 $\beta$  histoscores and other variables.** Expression of IL-1 $\beta$  in both endometriosis stroma and epithelium was correlated with more severe deep dyspareunia (epithelium **(A)**:  $r=0.37$ ,  $P=0.02$ ; stroma **(B)**:  $r=0.37$ ,  $P=0.02$ ) and greater nerve fibre bundle density around endometriosis (epithelium **(C)**:  $r=0.42$ ,  $P=0.01$ ; stroma **(D)**:  $r=0.45$ ,  $P<0.01$ ), while the expression of IL-1 $\beta$  in endometriosis epithelium was associated with a higher NGF expression in the endometriosis epithelium **(E)**:  $r=0.42$ ;  $P=0.01$ ) and stroma **(F)**:  $r=0.45$ ;  $P=0.01$ ).

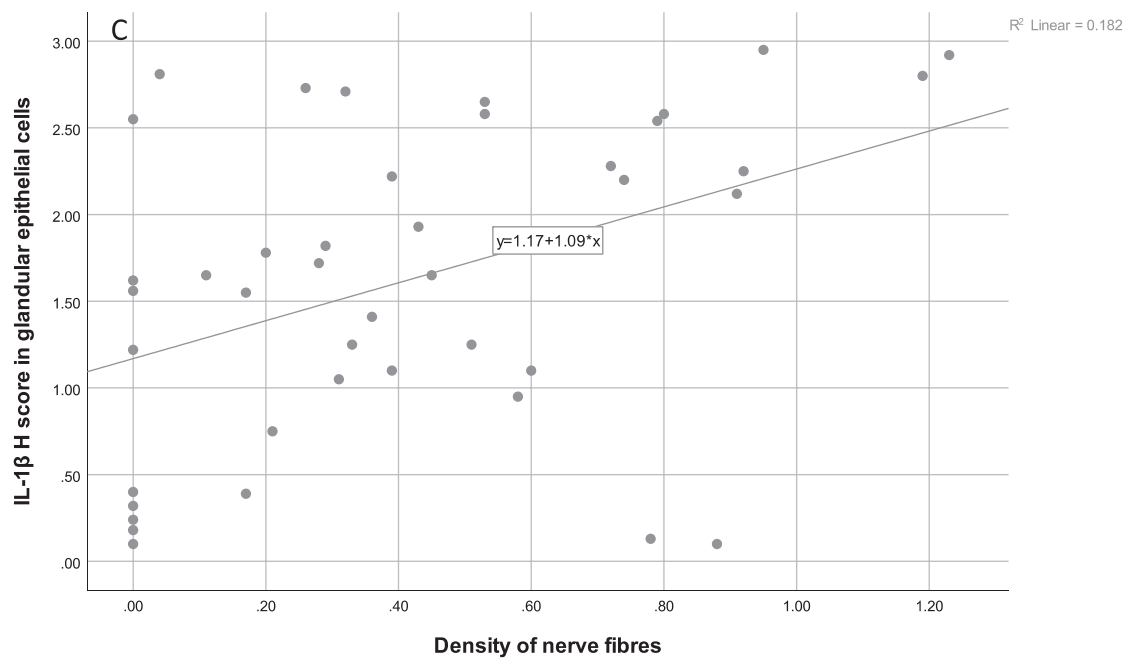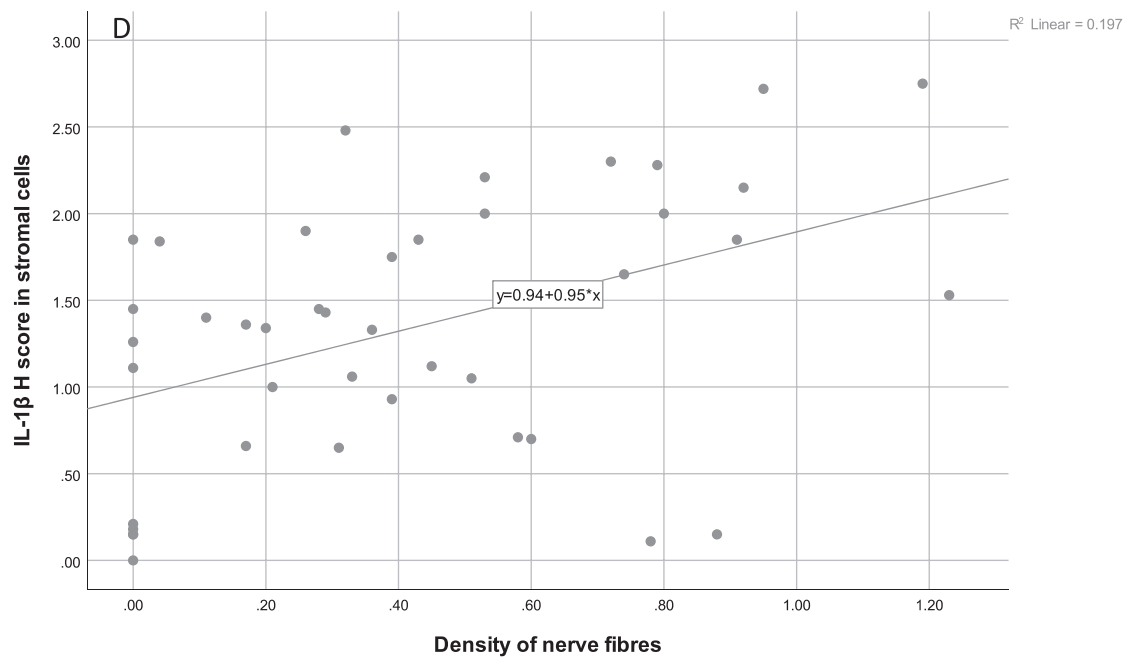

Supplementary Figure S2 Continued.

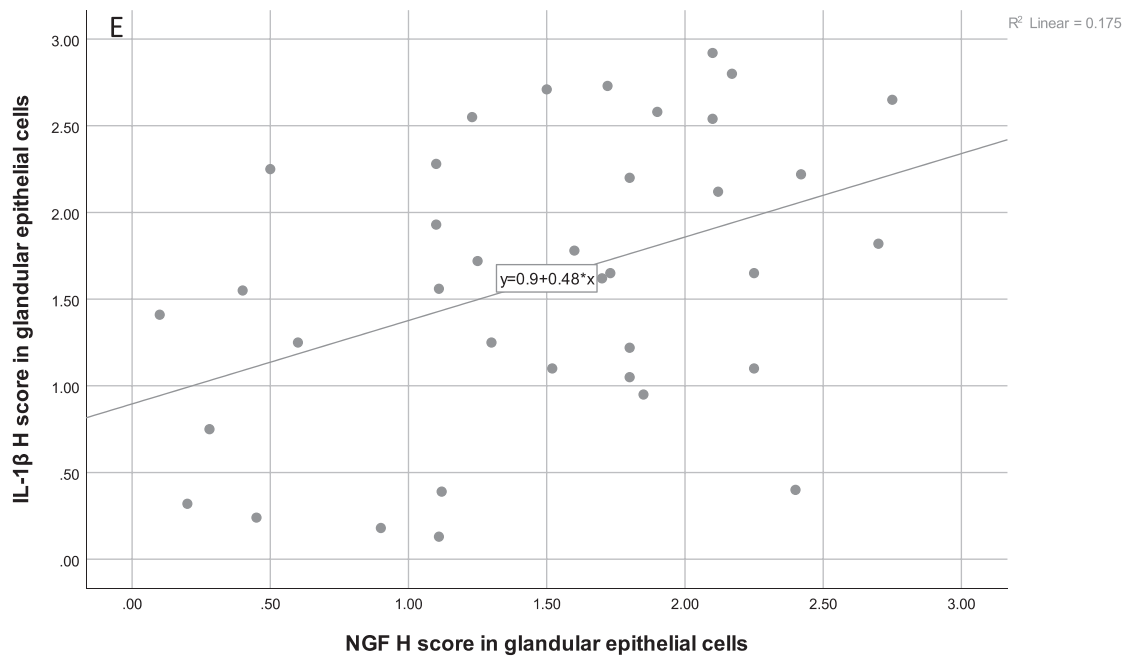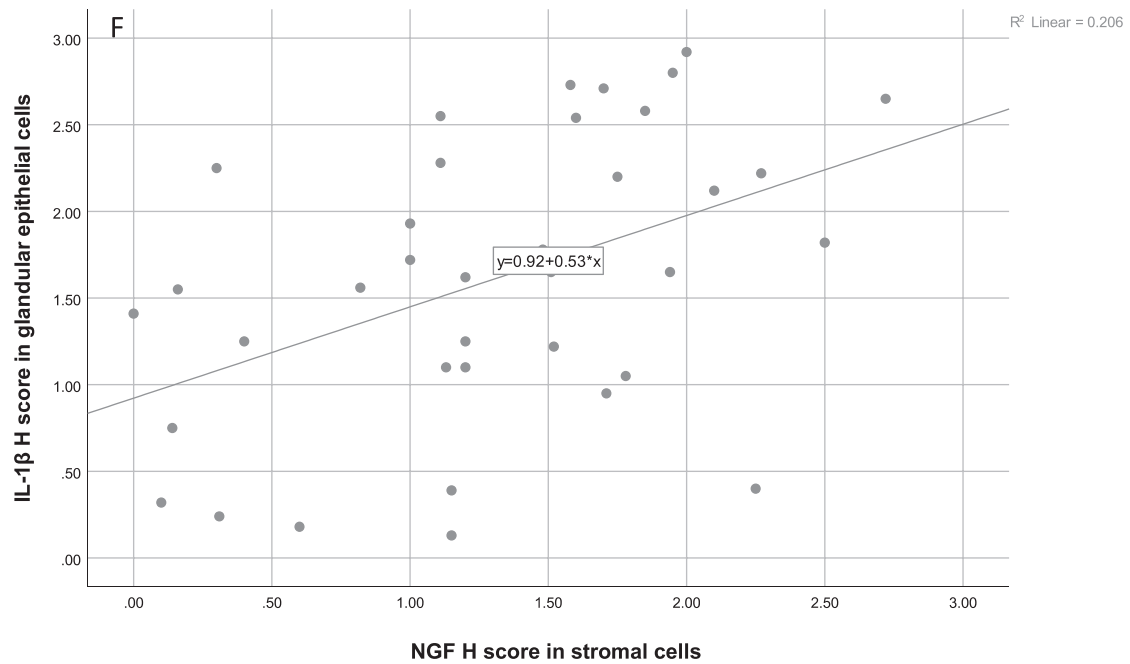

Supplement: supp_fig2_deaa017.pdf [file supp_fig2_deaa017.pdf]
