# Supplementary material
Source: PubMed Central journal article supplement (PMC7192531)
Supplement: supp_fig3_deaa017.pdf [file supp_fig3_deaa017.pdf]

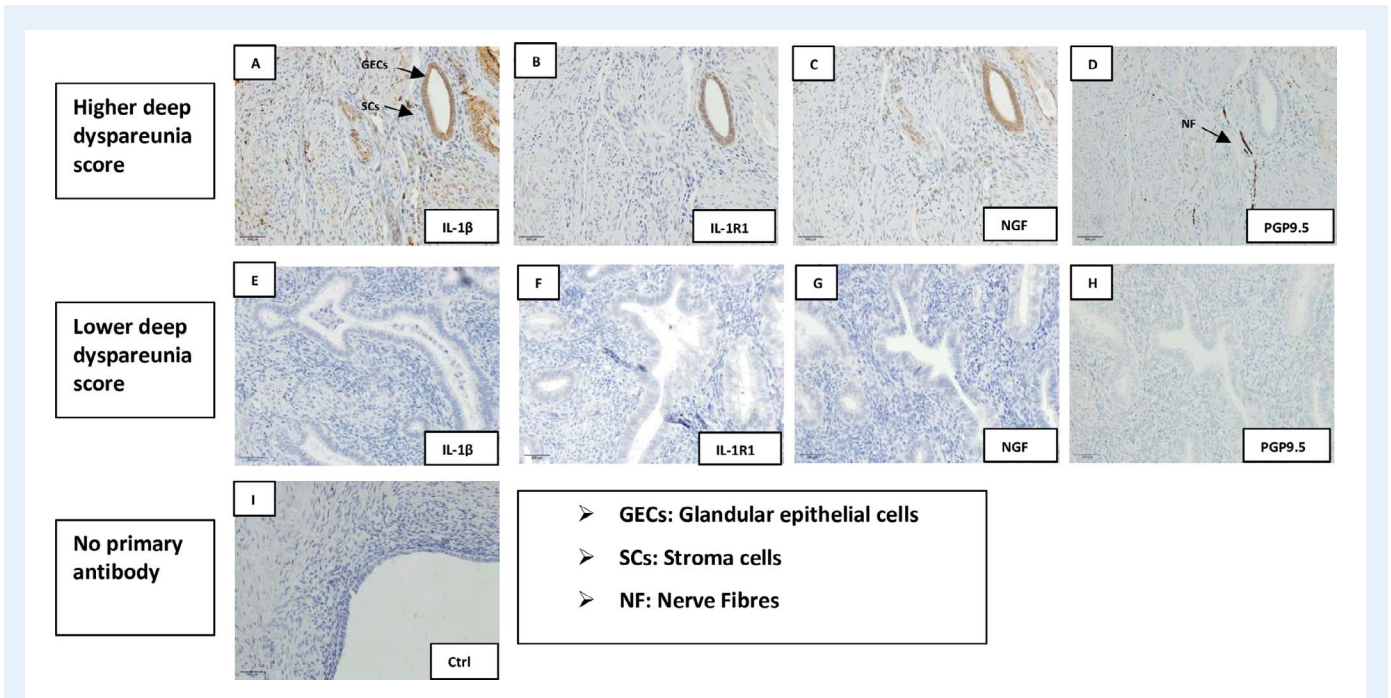

**Supplementary Figure S3** Adjacent sections of immunohistochemically stained slides. IHC of IL-1 $\beta$  (A,E), IL-1R1 (B,F), NGF (C,G) and PGP9.5 (D,H) was performed on surgically excised formalin-fixed paraffin-embedded (FFPE) endometriotic tissues. No staining was observed in control sections incubated without primary antibody (I). The top row (A–D) shows staining in a patient sample with higher deep dyspareunia score. The middle row (E–H) shows staining in a patient sample with lower deep dyspareunia scores. Abbreviations used: GEC, glandular epithelial cells; SC, stromal cells; NF, nerve fibres. Original magnification, all images,  $\times 10$ ; Bar = 200  $\mu$ m.
