# Supplementary material
Source: PubMed Central journal article supplement (PMC7192531)
Supplement: supp_fig4_deaa017.pdf [file supp_fig4_deaa017.pdf]

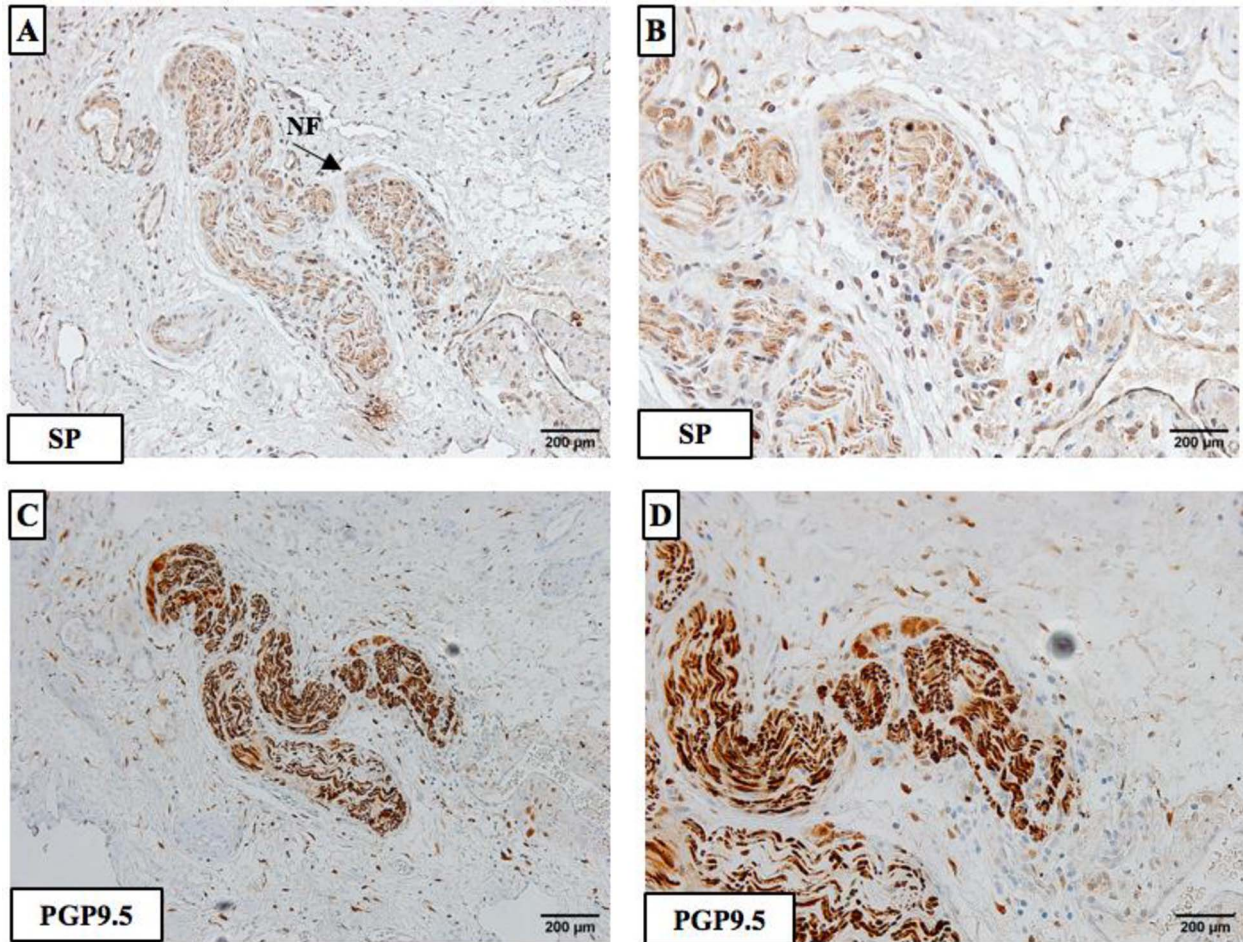

**Supplementary Figure S4 Immunohistochemical staining of nerve fibres.** IHC of substance P (**A,B**) and PGP9.5 (**C,D**) on surgically excised formalin-fixed paraffin-embedded (FFPE) endometriotic tissues. Abbreviations used: SP, substance P; NF, nerve fibres. Original magnification, images A and C,  $\times 10$ ; Bar = 200  $\mu\text{m}$ , images B and D,  $20\times$ ; bar = 200  $\mu\text{m}$ .
