# Supplementary material
Source: PubMed Central journal article supplement (PMC7192531)
Supplement: supp_table1_deaa017.pdf [file supp_table1_deaa017.pdf]

**Supplementary Table S1** Correlations with Substance P nerve density.

| Spearman's correlation                              | Nerve fibre density using SP antibody |                           |    |
|-----------------------------------------------------|---------------------------------------|---------------------------|----|
|                                                     | Correlation coefficient               | Significance (two-tailed) | N  |
| Nerve fibre bundle density using PGP 9.5 antibody   | 0.59 <sup>a</sup>                     | 0.04                      | 12 |
| Deep dyspareunia (0–10)                             | 0.08                                  | 0.83                      | 10 |
| IL-1 $\beta$ Histoscore in endometriotic epithelium | 0.08                                  | 0.82                      | 11 |
| IL-1 $\beta$ Histoscore in endometriotic stroma     | −0.17                                 | 0.62                      | 11 |
| NGF Histoscore in endometriotic epithelium          | 0.33                                  | 0.43                      | 8  |
| NGF Histoscore in endometriotic stroma              | 0.37                                  | 0.37                      | 8  |
| IL-1RI Histoscore in endometriotic epithelium       | 0.41                                  | 0.21                      | 11 |
| IL-1RI Histoscore in endometriotic stroma           | 0.22                                  | 0.52                      | 11 |

Spearman correlation significant at the 0.05 level<sup>a</sup>
